# Supplementary material for: Unexpected spontaneous symmetry breaking and diverse ferroicity in two-dimensional mono-metal phosphorus chalcogenides
Source: Royal Society of Chemistry journal article supplement (doi:10.1039/d2nr04710a), 2022-11-21
Supplement: d2nr04710a1.pdf [file d2nr04710a1.pdf]

## Supplementary Material

### Unexpected Spontaneous Symmetry Breaking and Diverse Ferroicity emerged in Two-dimensional Mono-Metal Phosphorus Chalcogenides

Hou-Yi Lyu<sup>1†</sup>, Xing-Yu Ma<sup>2†</sup>, Kuan-Rong Hao<sup>2</sup>, Zhen-Gang Zhu<sup>2,3</sup>, Qing-Bo Yan<sup>1\*</sup>, Gang Su<sup>4,2,1\*</sup>

<sup>1</sup>Center of Materials Science and Optoelectronics Engineering, College of Materials Science and Optoelectronic Technology, University of Chinese Academy of Sciences, Beijing 100049, China.

<sup>2</sup>School of Physical Sciences, University of Chinese Academy of Sciences, Beijing 100049, China.

<sup>3</sup>School of Electronic, Electrical and Communication Engineering, University of Chinese Academy of Sciences, Beijing 100049, China.

<sup>4</sup>Kavli Institute for Theoretical Sciences, and CAS Center of Excellence in Topological Quantum Computation, University of Chinese Academy of Sciences, Beijing 100190, China

† These authors contributed equally to this work

Email: [yan@ucas.ac.cn](mailto:yan@ucas.ac.cn) (Q.-B. Yan)

Email: [gsu@ucas.ac.cn](mailto:gsu@ucas.ac.cn) (G. Su)

## Table of Contents

|                                                                                 |    |
|---------------------------------------------------------------------------------|----|
| 1. The calculation of out-of-plane electric polarization.....                   | 1  |
| 2. The calculation of piezoelectric coefficients .....                          | 2  |
| 3. The considered magnetic configurations.....                                  | 3  |
| 4. Phonon dispersion of 2D ferroelectric $MPX_3$ members .....                  | 4  |
| 5. Phonon dispersion of non-ferroelectric 2D $MPX_3$ members .....              | 5  |
| 6. The thermodynamic stability of ferroelectric 2D $MPX_3$ members.....         | 8  |
| 7. Electronic energy band of 2D ferroelectric $MPX_3$ members.....              | 9  |
| 8. Electronic energy bands of stable non-ferroelectric 2D $MPX_3$ members ..... | 10 |
| 9. The piezoelectric properteis of 2D ferroelectric $MPX_3$ members.....        | 12 |
| 10. The ferroelectric trantition path of 2D ferroelectric $MPX_3$ members ..... | 13 |
| 11. Stable anti-ferromagnetic (AFM) 2D $MPX_3$ members.....                     | 14 |
| References .....                                                                | 15 |

---

## 1. The calculation of out-of-plane electric polarization

The total out-of-plane electric polarization per unitcell has the form of  $P_{unitcell} = P_{ion} + P_{el}$ , where  $P_{ion}$  and  $P_{el}$  represents the out-of-plane ion polarization and out-of-plane electron polarization, respectively. We calculate  $P_{ion}$  based on the point charge model. The out-of-plane electron polarization is calculated using  $P_{el} = \iint z\rho(\vec{r})d\vec{r}$ , where  $\rho(\vec{r})$  is the electron density and  $z$  is the spatial position along the  $z$  direction. The electric polarization can be defined in 3D or 2D form, and the conversion equations  $P_{unitcell} = P_{3D} \times V = P_{2D} \times S$ , where  $V$  and  $S$  are the volume and area of unitcell, respectively. We adopt pC/m as the unit of  $P_{2D}$  in the main text.

---

## 2. The calculation of piezoelectric coefficients

Piezoelectricity is a property of electric polarization caused by macroscopic strains. The piezoelectricity of 2D materials can be described by the coupling between surface polarization ( $P_i$ ), macroscopic electric field ( $E_i$ ), and stress ( $\sigma_{jk}$ ) or strain ( $\varepsilon_{jk}$ ), *i.e.*,  $e_{ijk} = \partial P_i / \partial \varepsilon_{jk} = \partial \sigma_{jk} / \partial E_i$  and  $d_{ijk} = \partial P_i / \partial \sigma_{jk} = \partial \varepsilon_{jk} / \partial E_i$ . The subscripts  $i, j$ , and  $k \in \{1,2,3\}$ , where 1, 2, and 3 correspond to the spatial  $x, y$ , and  $z$  directions, respectively. In the Voigt notation,  $e_{ijk}$  and  $d_{ijk}$  are reduced to  $e_{il}$  and  $d_{ib}$ , respectively, where  $l \in \{1,2, \dots, 6\}$ , which are correlated by elastic stiffness tensor  $C_{kl}$  as  $e_{il} = d_{ik} C_{kl}$ .

We adopted the methods proposed by Evan J. Reed [1] and Richard G. Hennig et. al., [2], which combines the symmetry analysis and DFT calculations to obtain the piezoelectric coefficients of 2D materials. DFT programs like VASP calculate the piezoelectric coefficients assuming periodic boundary conditions in a 3D system. To convert these coefficients to a 2D system, the above method assumes plane stress and plane strain conditions ( $\varepsilon_{ij} = \sigma_{ij} = 0$  for  $i = 3$  or  $j = 3$ ) but the polarization is not limited to be in-plane [2], which implies that the  $d_{33}$  or  $e_{33}$  are not considered. The point group of the ferroelectric 2D  $MPX_3$  members is  $3m (C_{3v})$  and the mirror symmetry is missing, which mean that they can exhibit nonzero in-plane coefficients  $e_{11}$  ( $d_{11}$ ) and out-of-plane coefficients  $e_{31}$  ( $d_{31}$ ).

---

### 3. The considered magnetic configurations

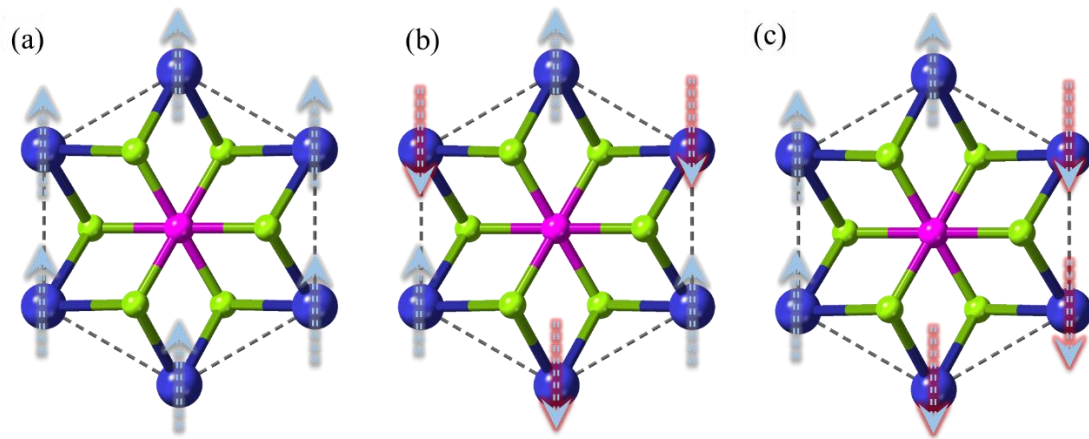

**Figure S1.** The considered magnetic configurations. (a) ferromagnetic and (b) Néel antiferromagnetic and (c) zigzag-antiferromagnetic configuration. Blue, purple, and green balls represent M, P, and X atoms, respectively. Blue and red arrows indicate the directions of magnetic moments. By comparing the energy of different magnetic configurations, we obtained the preferred magnetic order.

## 4. Phonon dispersion of 2D ferroelectric MPX<sub>3</sub> members

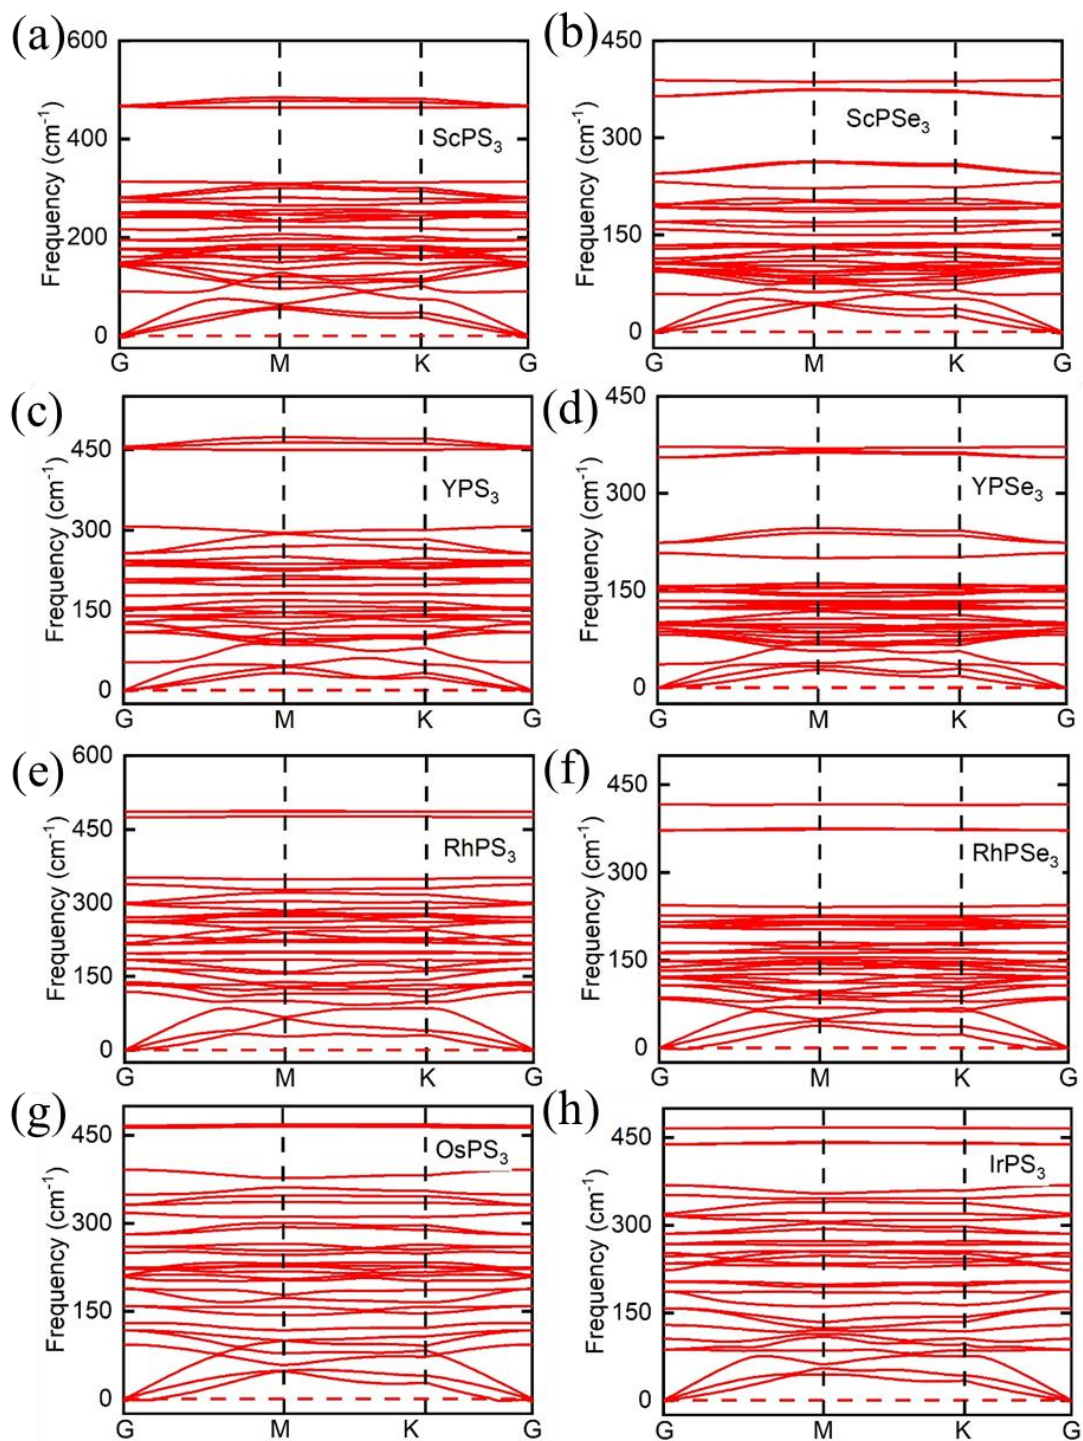

**Figure S2.** The phonon dispersions for 2D ferroelectric MPX<sub>3</sub> members.

## 5. Phonon dispersion of non-ferroelectric 2D MPX<sub>3</sub> members

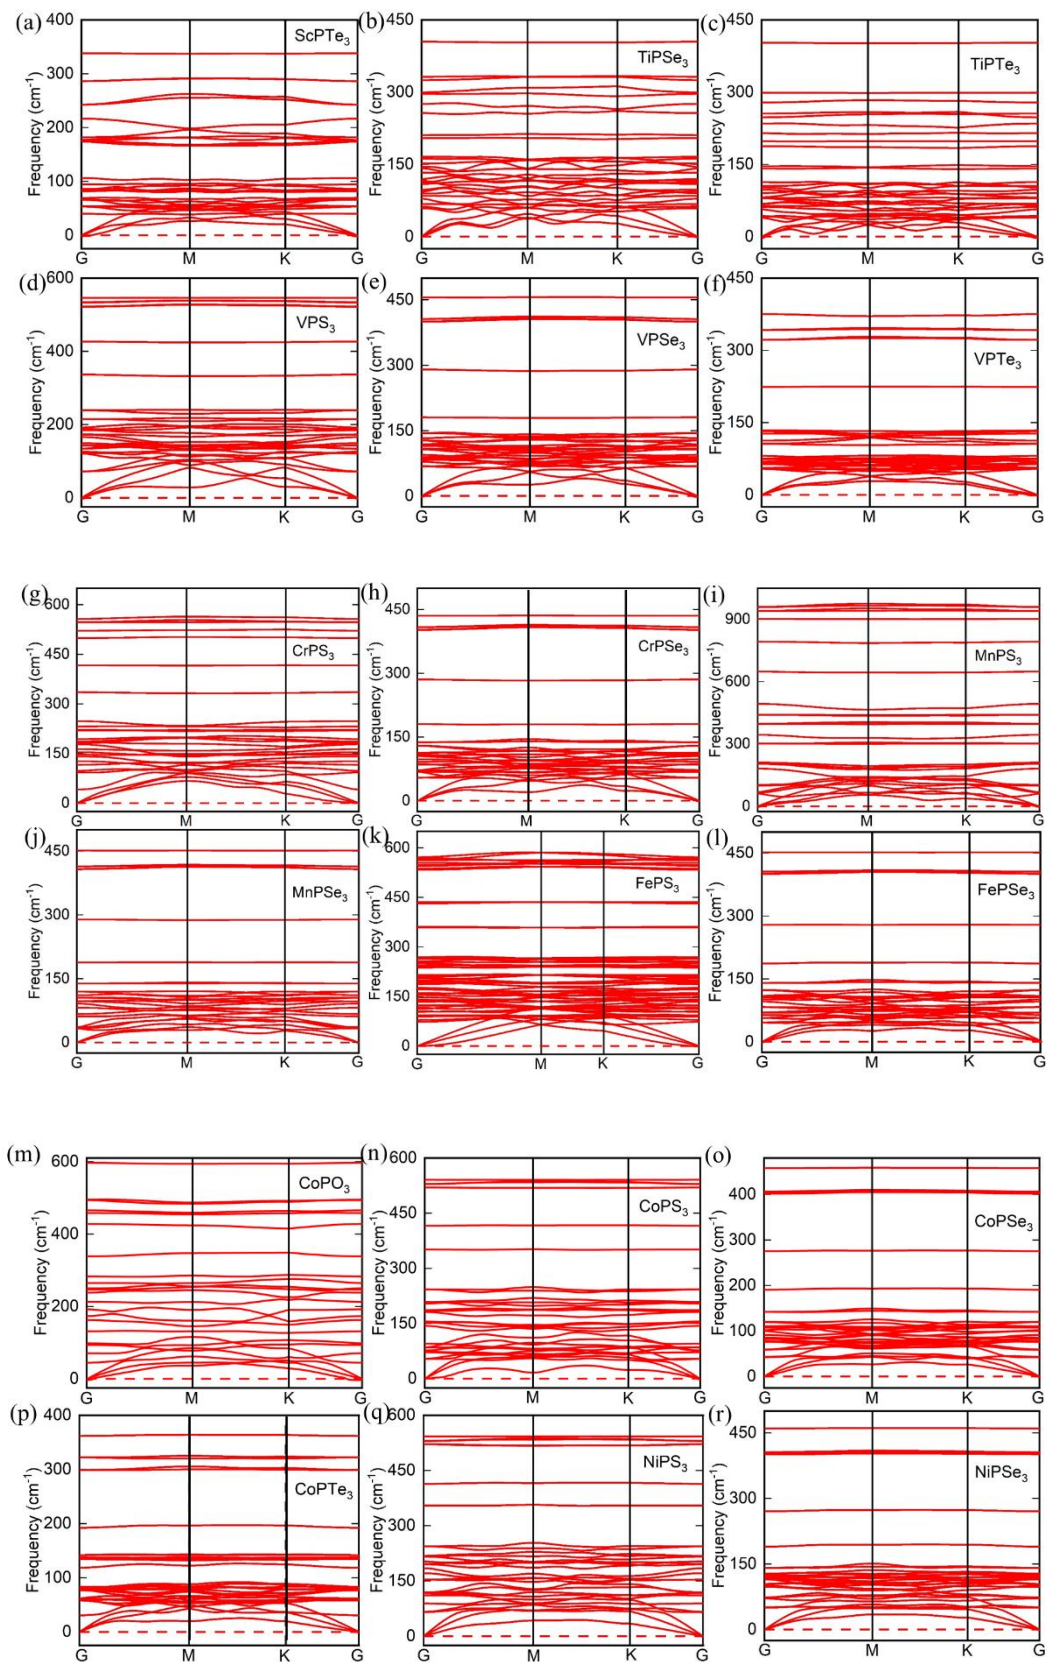

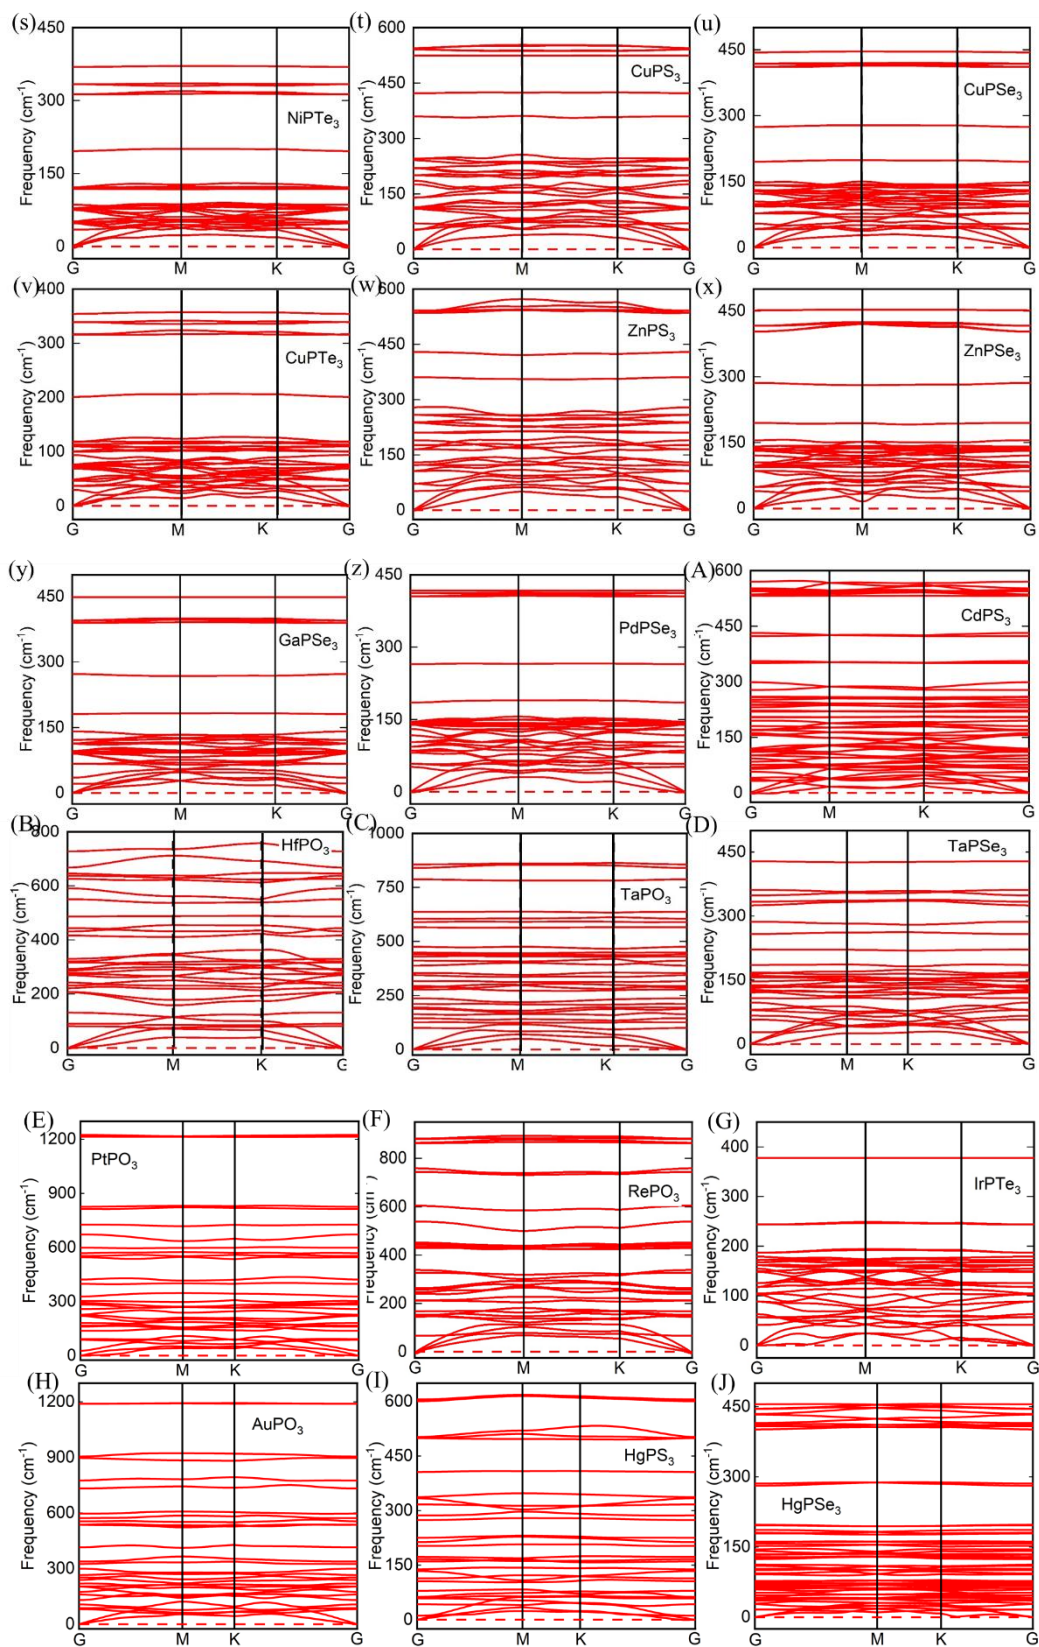



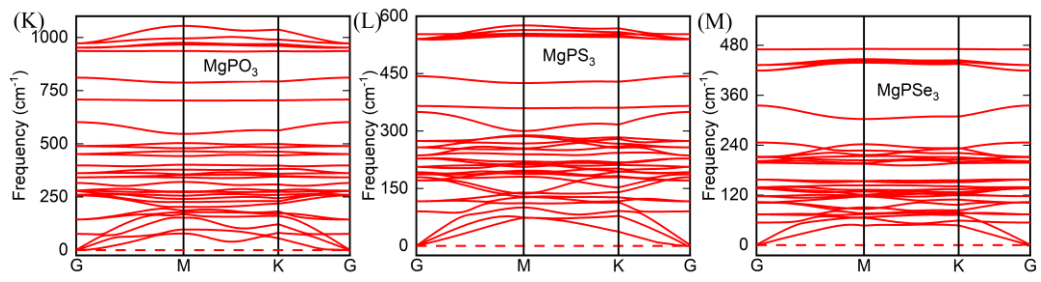

**Figure S3.** Phonon band structures of non-ferroelectric 2D MPX<sub>3</sub>.

---

## 6. The thermodynamic stability of ferroelectric 2D MPX<sub>3</sub> members

The thermodynamic stability can be described by the heat of formation ( $E_f$ ). We calculated the heat of formation of ferroelectric 2D MPX<sub>3</sub> members with dynamic stability. Here, the heat of formation ( $E_f$ ) are obtained by using the equation  $E_f = \frac{E(M_2P_2X_6) - 2 \times E(M) - 2 \times E(P) - 6 \times E(X)}{10}$ , where  $E(M_2P_2X_6)$ ,  $E(M)$ ,  $E(P)$  and  $E(X)$  represent the energy of per unit cell ( $M_2P_2X_6$ ), the average energy (per atom) of simple substance M, P and X, respectively. According to above definition,  $E_f < 0$  implies that the process forming the compound from simple substances is exothermic, and a more negative  $E_f$  indicates a better thermodynamic stability. The results are listed in Table S1. The  $E_f$  of eight ferroelectric members are negative, and most of them are ranging from -1.47 to -2.41 eV, except that of monolayer OsPS<sub>3</sub> is only -0.49 eV, indicating that most of them have good thermodynamic stability. As a comparison, the  $E_f$  of monolayer MnPS<sub>3</sub>, MnPSe<sub>3</sub> and NiPS<sub>3</sub> obtained with the same method are -2.07, -1.22 and -2.18 eV, respectively. Note that their monolayer or few-layer forms had already been successfully synthesized.[3-5] Thus, these materials not only have good dynamic stability but also have good thermodynamic stability, and most of them are promising to be synthesized experimentally in future.

**Table S1.** The heat of formation of ferroelectric 2D MPX<sub>3</sub> members

---

| <b>Formula</b>                                 | <b><math>E_f/\text{atom}</math> (eV)</b> |
|------------------------------------------------|------------------------------------------|
| Sc <sub>2</sub> P <sub>2</sub> S <sub>6</sub>  | -2.24                                    |
| Sc <sub>2</sub> P <sub>2</sub> Se <sub>6</sub> | -1.47                                    |
| Y <sub>2</sub> P <sub>2</sub> S <sub>6</sub>   | -2.41                                    |
| Y <sub>2</sub> P <sub>2</sub> Se <sub>6</sub>  | -1.64                                    |
| Rh <sub>2</sub> P <sub>2</sub> S <sub>6</sub>  | -2.41                                    |
| Rh <sub>2</sub> P <sub>2</sub> Se <sub>6</sub> | -1.73                                    |
| Os <sub>2</sub> P <sub>2</sub> S <sub>6</sub>  | -0.49                                    |
| Ir <sub>2</sub> P <sub>2</sub> S <sub>6</sub>  | -1.97                                    |

---

## 7. Electronic energy band of 2D ferroelectric MPX<sub>3</sub> members

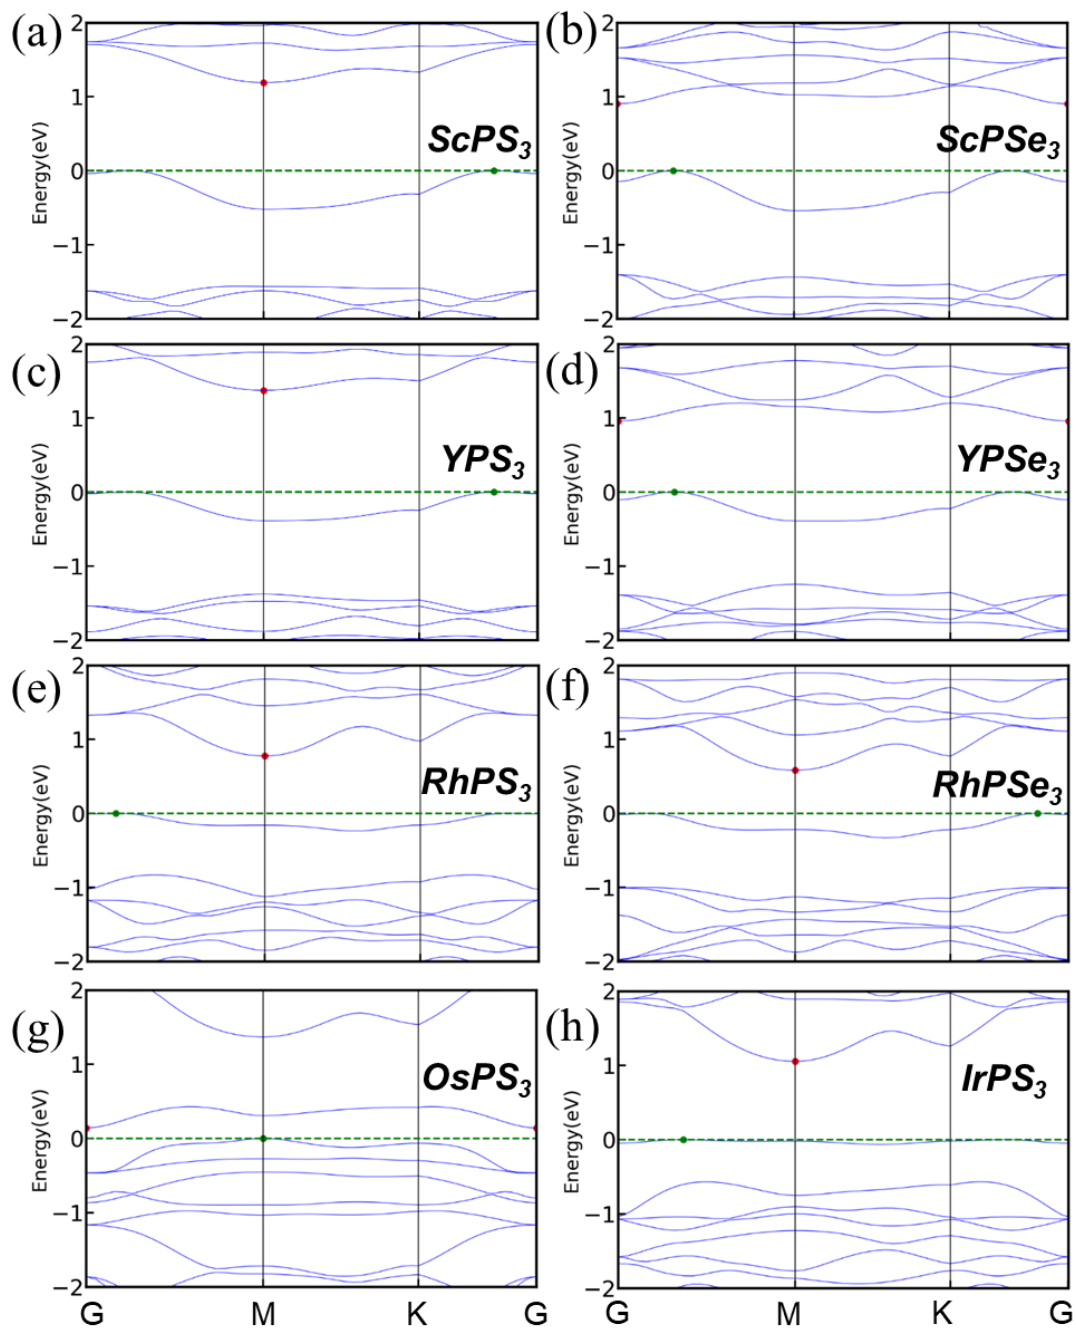

**Figure S4.** Electronic band structures (GGA+U) of 2D ferroelectric MPX<sub>3</sub> members. The Fermi level is set as zero.

## 8. Electronic energy bands of stable non-ferroelectric 2D $MPX_3$ members

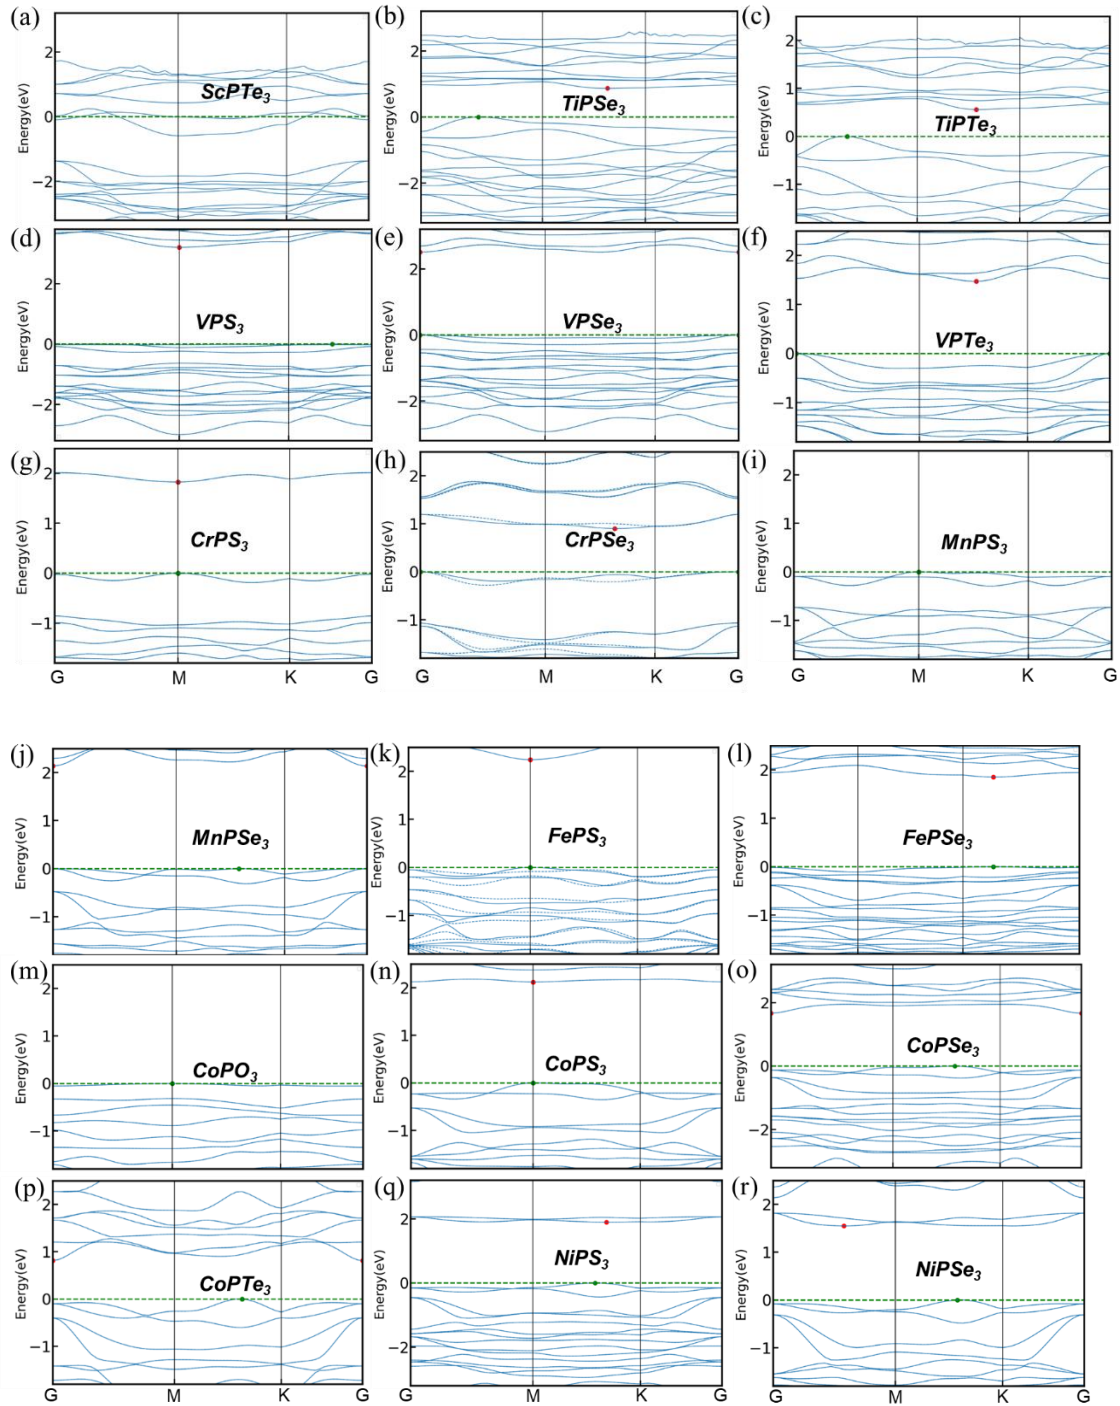

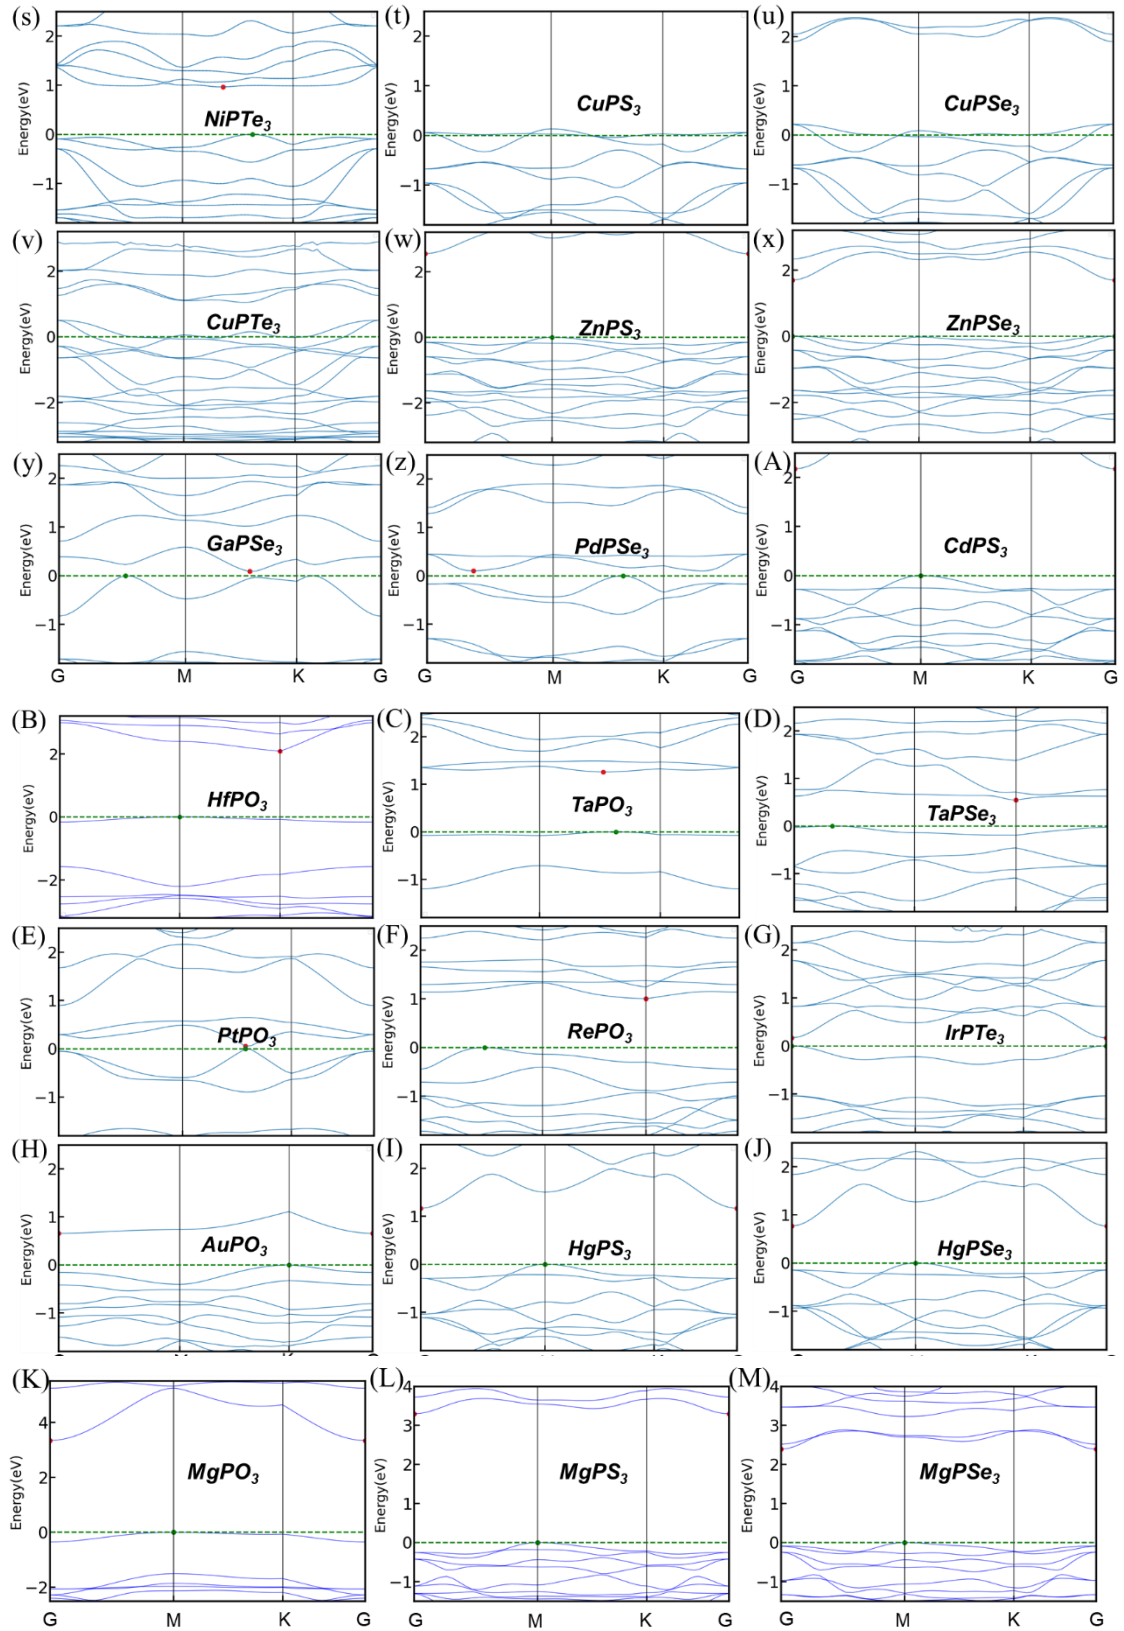

**Figure S5.** Electronic band structures (PBE-GGA+U) for stable 2D non-ferroelectric  $MPX_3$ . The Fermi level is set as zero.

---

## 9. The piezoelectric properteis of 2D ferroelectric MPX<sub>3</sub> members

**Table S2.** Elastic stiffness and piezoelectric coefficients of stable 2D ferroelectric MPX<sub>3</sub> members

| <b>Formula</b>     | <b>C<sub>11</sub><br/>(N/m)</b> | <b>C<sub>12</sub><br/>(N/m)</b> | <b><i>e</i><sub>11</sub><br/>(10<sup>-10</sup> C/m)</b> | <b><i>e</i><sub>31</sub><br/>(10<sup>-10</sup> C/m)</b> | <b>Piezoelectric<br/>(<i>d</i><sub>11</sub>, pm/V)</b> | <b>Piezoelectric<br/>(<i>d</i><sub>31</sub>, pm/V)</b> |
|--------------------|---------------------------------|---------------------------------|---------------------------------------------------------|---------------------------------------------------------|--------------------------------------------------------|--------------------------------------------------------|
| ScPS <sub>3</sub>  | 45.64                           | 31.80                           | 6.52                                                    | 0.58                                                    | 47.12                                                  | 0.36                                                   |
| ScPSe <sub>3</sub> | 40.86                           | 25.14                           | 4.88                                                    | 0.50                                                    | 31.07                                                  | 1.69                                                   |
| YPS <sub>3</sub>   | 42.82                           | 27.70                           | 5.98                                                    | 0.07                                                    | 39.55                                                  | 0.01                                                   |
| YPSe <sub>3</sub>  | 36.38                           | 20.93                           | 4.56                                                    | 0.04                                                    | 29.48                                                  | 0.01                                                   |
| RhPS <sub>3</sub>  | 77.01                           | 36.83                           | 1.99                                                    | 0.75                                                    | 4.96                                                   | 0.01                                                   |
| RhPSe <sub>3</sub> | 69.57                           | 32.44                           | 1.87                                                    | 0.55                                                    | 5.03                                                   | 0.21                                                   |
| IrPS <sub>3</sub>  | 88.26                           | 37.81                           | 1.97                                                    | 0.72                                                    | 3.90                                                   | 0.50                                                   |

---

## 10. The ferroelectric transition path of 2D ferroelectric $MPX_3$ members

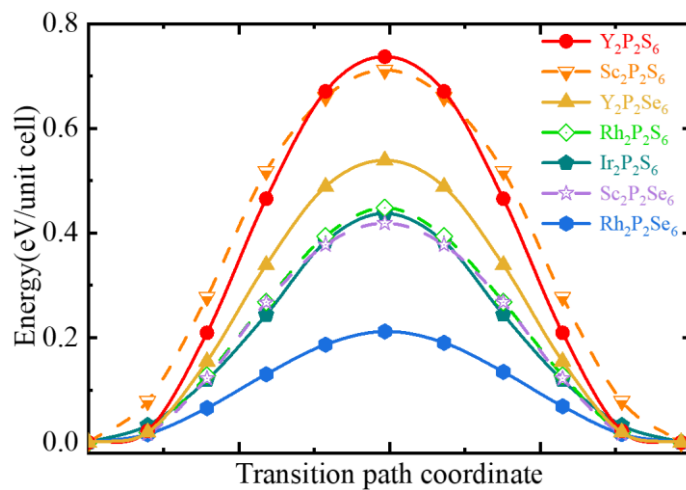

**Figure S6.** Ferroelectric transition barrier diagram of stable ferroelectric  $MPX_3$  members obtained by CI-NEB calculations.

The ferroelectric transition path of 2D ferroelectric  $MPX_3$  members are obtained by employing the CI-NEB (Climbing Image Nudged Elastic Band) method, which was developed by H. Jónsson and G. Henkelman group [6] and implemented in VTST scripts [7]. The energy barriers are listed in Table 1 of the main text.

---

## 11. Stable anti-ferromagnetic (AFM) 2D MPX<sub>3</sub> members

**Table S3.** Band gap and preferred magnetic order of stable 2D AFM MPX<sub>3</sub> members

| Unit cell<br>Formula                           | gap / eV | preferred magnetic<br>order |
|------------------------------------------------|----------|-----------------------------|
| Co <sub>2</sub> P <sub>2</sub> O <sub>6</sub>  | 3.17     | zigzag                      |
| Co <sub>2</sub> P <sub>2</sub> S <sub>6</sub>  | 2.12     | zigzag                      |
| Co <sub>2</sub> P <sub>2</sub> Se <sub>6</sub> | 1.67     | zigzag                      |
| Co <sub>2</sub> P <sub>2</sub> Te <sub>6</sub> | 0.81     | zigzag                      |
| Cr <sub>2</sub> P <sub>2</sub> S <sub>6</sub>  | 1.83     | Néel                        |
| Cr <sub>2</sub> P <sub>2</sub> Se <sub>6</sub> | 0.90     | Néel                        |
| Fe <sub>2</sub> P <sub>2</sub> S <sub>6</sub>  | 2.24     | zigzag                      |
| Fe <sub>2</sub> P <sub>2</sub> Se <sub>6</sub> | 1.85     | zigzag                      |
| Mn <sub>2</sub> P <sub>2</sub> S <sub>6</sub>  | 2.85     | Néel                        |
| Mn <sub>2</sub> P <sub>2</sub> Se <sub>6</sub> | 2.14     | Néel                        |
| Ni <sub>2</sub> P <sub>2</sub> S <sub>6</sub>  | 1.90     | zigzag                      |
| Ni <sub>2</sub> P <sub>2</sub> Se <sub>6</sub> | 1.55     | zigzag                      |
| Ni <sub>2</sub> P <sub>2</sub> Te <sub>6</sub> | 0.96     | zigzag                      |
| V <sub>2</sub> P <sub>2</sub> S <sub>6</sub>   | 3.20     | Néel                        |
| V <sub>2</sub> P <sub>2</sub> Se <sub>6</sub>  | 2.51     | Néel                        |
| V <sub>2</sub> P <sub>2</sub> Te <sub>6</sub>  | 1.47     | Néel                        |



---

## References

- [1] K. N. Duerloo, M. T. Ong, and E. J. Reed. Intrinsic Piezoelectricity in Two-Dimensional Materials. *J. Phys. Chem. Lett.* 3, 2871–2876 (2012).
- [2] M. N. Blonsky, H. L. Zhuang, A. K. Singh, and R. G. Hennig. Ab Initio Prediction of Piezoelectricity in Two-Dimensional Materials. *ACS Nano* 9, 9885–9891 (2015).
- [3] K. Kim, S. Y. Lim, J. Kim, et. al. Antiferromagnetic ordering in van der Waals 2D magnetic material  $\text{MnPS}_3$  probed by Raman spectroscopy. *2D Mater.* 6, 041001(2019).
- [4] Z. Ni, A. V. Haglund, H. Wang, et. al. Imaging the Néel vector switching in the monolayer antiferromagnet  $\text{MnPSe}_3$  with strain-controlled Ising order. *Nat. Nanotechnol.* 16, 782–787 (2021).
- [5] C. Ho, T. Hsu and L. C. Muhimma. The band-edge excitons observed in few-layer  $\text{NiPS}_3$ . *npj 2D Mater. Appl.* 5, 8 (2021).
- [6] <https://theory.cm.utexas.edu/henkelman/>.
- [7] <https://theory.cm.utexas.edu/vtsttools/index.html>
